# Supplementary material
Source: HighWire-hosted journal article supplement (http://www.qdcxjkg.com/highwire/filestream/113719/field_highwire_adjunct_files/0/ERJ-01044-2012_Disclosures.pdf)
Supplement: ERJ-01044-2012_Disclosures.pdf [file ERJ-01044-2012_Disclosures.pdf]

G. Höffken has received funds from ThermoFisher Scientific for IIT clinical trials, fee as speaker and as an advisory board member.

M. Kolditz received honoraria from BRAHMS / ThermoFisher for lectures and advisory board activities.
